# Supplementary material for: Genome-Wide Investigation Using sRNA-Seq, Degradome-Seq and Transcriptome-Seq Reveals Regulatory Networks of microRNAs and Their Target Genes in Soybean during Soybean mosaic virus Infection
Source: PLoS One. 2016 Mar 10;11(3):e0150582. doi: 10.1371/journal.pone.0150582 (PMC4786119; doi:10.1371/journal.pone.0150582)
Supplement: S9 Table — (XLSX) [file pone.0150582.s013.xlsx]

## Sheet: genes involved in networks
Table S9. List of genes involved in the shared or unique regulatory network induced by SMV infection with three isolates in soybean
Glyma 1.1 ID (1)	Protein Length (AA)	Top Uniref100 Blastp Hit (2)	E-value (E<10-6)	% Coverage	Top Descriptive Uniref100 Blastp Hit (3)	E-value (E<10-6)	% Coverage	Top TAIR10 Blastp Hit (4)	E-value (E<10-6)	Coverage	Gene Ontology Biological Process IDs (5)	Gene Ontology Biological Process Descriptions	Gene Ontology Molecular Function IDs (6)	Gene Ontology Molecular Function Descriptions	Gene Ontology Cellular Component IDs (7)	Gene Ontology Cellular Component Descriptions	PFAM IDs (8)	PFAM_Descriptions	Panther IDs (9)	Panther_Descriptions	KOG IDs (10)	KOG_Desctiptions	EC IDs (11)	EC_Descriptions	KO IDs (12)	KO_Descriptions
Shared network induced by G2-L, G2-LRB and G7
Glyma08g39110	1460	UniRef100_I1KXC2 Uncharacterized protein n=1 Tax=Glycine max RepID=I1KXC2_SOYBN	0	99.93	UniRef100_B9SPI3 Alpha-glucan water dikinase, chloroplast, putative n=1 Tax=Ricinus communis RepID=B9SPI3_RICCO	0	99.93	AT1G10760.1 | Symbols: SEX1, SOP1, SOP, GWD1, GWD | Pyruvate phosphate dikinase, PEP/pyruvate binding domain | chr1:3581210-3590043 REVERSE LENGTH=1399	0	95.55	GO:0005982 GO:0005983 GO:0007623 GO:0009610 GO:0009631 GO:0010353 GO:0016310 GO:0019252	starch metabolic process; "starch catabolic process"; "circadian rhythm"; "response to symbiotic fungus"; "cold acclimation"; "response to trehalose stimulus"; "phosphorylation"; "starch biosynthetic process"	GO:0005515 GO:0005524 GO:0016301 GO:0050521	protein binding; "ATP binding"; "kinase activity"; "alpha-glucan, water dikinase activity"	GO:0005739 GO:0009507 GO:0009570 GO:0009941	mitochondrion; "chloroplast"; "chloroplast stroma"; "chloroplast envelope"	PF01326	Pyruvate phosphate dikinase, PEP/pyruvate binding domain	PTHR22931 PTHR22931:SF1	PHOSPHOENOLPYRUVATE DIKINASE-RELATED; "ALPHA-GLUCAN WATER DIKINASE, CHLOROPLAST PRECURSOR"	NA	NA	2.7.9.4	alpha-glucan,_water_dikinase	K08244	alpha-glucan,_water_dikinase_[EC:2.7.9.4]
Glyma11g03500	382	UniRef100_I1LGP4 Uncharacterized protein n=2 Tax=Glycine max RepID=I1LGP4_SOYBN	0	99.74	UniRef100_G7JW26 Aspartic proteinase nepenthesin-2 n=1 Tax=Medicago truncatula RepID=G7JW26_MEDTR	0	99.74	AT4G16563.1 | Symbols: | Eukaryotic aspartyl protease family protein | chr4:9329933-9331432 REVERSE LENGTH=499	1e-170	98.69	GO:0006508	proteolysis	GO:0004190	aspartic-type endopeptidase activity	GO:0005576 GO:0009505	extracellular region; "plant-type cell wall"	PF00026	Eukaryotic aspartyl protease	PTHR13683 PTHR13683:SF98	ASPARTYL PROTEASES; "CHLOROPLAST NUCLEIOD DNA-BINDING-RELATED"	KOG1339	Aspartyl_protease	NA	NA	NA	NA
Glyma11g05160	147	UniRef100_C6TFI8 Uncharacterized protein n=1 Tax=Glycine max RepID=C6TFI8_SOYBN	3e-99	99.32	UniRef100_B9SH02 60S ribosomal protein L26, putative n=1 Tax=Ricinus communis RepID=B9SH02_RICCO	3e-91	99.32	AT3G49910.1 | Symbols: | Translation protein SH3-like family protein | chr3:18504311-18504751 FORWARD LENGTH=146	4e-91	99.32	GO:0001510 GO:0006412 GO:0009409	RNA methylation; "translation"; "response to cold"	GO:0003735	structural constituent of ribosome	GO:0005622 GO:0005634 GO:0005730 GO:0005774 GO:0005829 GO:0005840 GO:0005886 GO:0009507 GO:0015934 GO:0016020 GO:0022625 GO:0022626	intracellular; "nucleus"; "nucleolus"; "vacuolar membrane"; "cytosol"; "ribosome"; "plasma membrane"; "chloroplast"; "large ribosomal subunit"; "membrane"; "cytosolic large ribosomal subunit"; "cytosolic ribosome"	PF00467	KOW motif	PTHR11143	60S RIBOSOMAL PROTEIN L26 FAMILY MEMBER	KOG3401	60S_ribosomal_protein_L26	NA	NA	K02898	large_subunit_ribosomal_protein_L26e
Glyma12g08440	297	UniRef100_I1LR70 Uncharacterized protein n=1 Tax=Glycine max RepID=I1LR70_SOYBN	0	99.66	UniRef100_B9SCH8 Metal ion binding protein, putative n=1 Tax=Ricinus communis RepID=B9SCH8_RICCO	1e-58	92.93	AT5G60800.1 | Symbols: | Heavy metal transport/detoxification superfamily protein | chr5:24461116-24462464 REVERSE LENGTH=283	7e-55	93.94	GO:0030001	metal ion transport	GO:0046872	metal ion binding	GO:0005886	plasma membrane	PF00403	Heavy-metal-associated domain	PTHR22814 PTHR22814:SF13	COPPER TRANSPORT PROTEIN ATOX1-RELATED; "COPPER CHAPERONE-RELATED"	KOG1603	Copper_chaperone	NA	NA	NA	NA
Unique network induced by G2-L
Glyma01g38930	253	UniRef100_I1J932 Uncharacterized protein n=2 Tax=Glycine max RepID=I1J932_SOYBN	0	99.6	UniRef100_G7K9G6 Protein disulfide-isomerase n=1 Tax=Medicago truncatula RepID=G7K9G6_MEDTR	9e-135	99.6	AT4G37200.1 | Symbols: HCF164 | Thioredoxin superfamily protein | chr4:17509836-17511230 REVERSE LENGTH=261	3e-110	99.6	GO:0006662 GO:0010190 GO:0019761 GO:0045454	glycerol ether metabolic process; "cytochrome b6f complex assembly"; "glucosinolate biosynthetic process"; "cell redox homeostasis"	GO:0009055 GO:0015035 GO:0016671	electron carrier activity; "protein disulfide oxidoreductase activity"; "oxidoreductase activity, acting on a sulfur group of donors, disulfide as acceptor"	GO:0009507 GO:0009534 GO:0009535 GO:0031977	chloroplast; "chloroplast thylakoid"; "chloroplast thylakoid membrane"; "thylakoid lumen"	PF00085	Thioredoxin	PTHR10438 PTHR10438:SF103	THIOREDOXIN-RELATED; "OS03G0767500 PROTEIN"	KOG0907	Thioredoxin	NA	NA	NA	NA
Glyma03g37460	213	UniRef100_C6SXM8 Ribosomal protein L19 n=1 Tax=Glycine max RepID=C6SXM8_SOYBN	3e-149	99.53	UniRef100_C6SXM8 Ribosomal protein L19 n=1 Tax=Glycine max RepID=C6SXM8_SOYBN	3e-149	99.53	AT3G16780.1 | Symbols: | Ribosomal protein L19e family protein | chr3:5708982-5710249 FORWARD LENGTH=209	5e-126	99.53	GO:0001510 GO:0006342 GO:0006412 GO:0009165 GO:0009220 GO:0042254 GO:0051567	RNA methylation; "chromatin silencing"; "translation"; "nucleotide biosynthetic process"; "pyrimidine ribonucleotide biosynthetic process"; "ribosome biogenesis"; "histone H3-K9 methylation"	GO:0003735	structural constituent of ribosome	GO:0005622 GO:0005737 GO:0005840 GO:0005886 GO:0022625	intracellular; "cytoplasm"; "ribosome"; "plasma membrane"; "cytosolic large ribosomal subunit"	PF01280	Ribosomal protein L19e	PTHR10722	60S RIBOSOMAL PROTEIN L19	KOG1696	60s_ribosomal_protein_L19	NA	NA	K02885	large_subunit_ribosomal_protein_L19e
Glyma05g33920	260	UniRef100_I1K5D1 Peptidyl-prolyl cis-trans isomerase n=1 Tax=Glycine max RepID=I1K5D1_SOYBN	0	99.62	UniRef100_I1K5D1 Peptidyl-prolyl cis-trans isomerase n=1 Tax=Glycine max RepID=I1K5D1_SOYBN	0	99.62	AT1G18170.1 | Symbols: | FKBP-like peptidyl-prolyl cis-trans isomerase family protein | chr1:6254291-6255507 FORWARD LENGTH=247	4e-91	75.38	GO:0000413 GO:0006457 GO:0018208	protein peptidyl-prolyl isomerization; "protein folding"; "peptidyl-proline modification"	GO:0003755 GO:0005528	peptidyl-prolyl cis-trans isomerase activity; "FK506 binding"	GO:0009507 GO:0009535	chloroplast; "chloroplast thylakoid membrane"	PF00254	FKBP-type peptidyl-prolyl cis-trans isomerase	PTHR10516 PTHR10516:SF122	FK506 BINDING PROTEIN; "IMMUNOPHILIN / FKBP-TYPE PEPTIDYL-PROLYL CIS-TRANS"	KOG0552	FKBP-type_peptidyl-prolyl_cis-trans_isomerase	NA	NA	NA	NA
Glyma06g10190	445	UniRef100_I1K9R7 Uncharacterized protein n=1 Tax=Glycine max RepID=I1K9R7_SOYBN	0	99.78	UniRef100_G7J4L2 Omega-hydroxypalmitate O-feruloyl transferase n=1 Tax=Medicago truncatula RepID=G7J4L2_MEDTR	0	98.2	AT4G24510.1 | Symbols: CER2, VC2, VC-2 | HXXXD-type acyl-transferase family protein | chr4:12660929-12662537 FORWARD LENGTH=421	9e-98	95.96	GO:0000038 GO:0010025 GO:0019344 GO:0042335 GO:0042546 GO:0042761	very long-chain fatty acid metabolic process; "wax biosynthetic process"; "cysteine biosynthetic process"; "cuticle development"; "cell wall biogenesis"; "very long-chain fatty acid biosynthetic process"	GO:0016740 GO:0016747	transferase activity; "transferase activity, transferring acyl groups other than amino-acyl groups"	GO:0005634 GO:0005783	nucleus; "endoplasmic reticulum"	PF02458	Transferase family	NA	NA	NA	NA	NA	NA	NA	NA
Glyma08g06010	380	UniRef100_I1KQM0 Uncharacterized protein n=1 Tax=Glycine max RepID=I1KQM0_SOYBN	0	99.74	UniRef100_G7LE77 Thioredoxin-like protein n=1 Tax=Medicago truncatula RepID=G7LE77_MEDTR	0	99.74	AT3G17880.1 | Symbols: HIP, ATTDX, ATHIP2, TDX | tetraticopeptide domain-containing thioredoxin | chr3:6123534-6126113 FORWARD LENGTH=380	6e-171	97.63	GO:0006457 GO:0010286 GO:0045454 GO:0051259	protein folding; "heat acclimation"; "cell redox homeostasis"; "protein oligomerization"	GO:0005515 GO:0016671 GO:0030544	protein binding; "oxidoreductase activity, acting on a sulfur group of donors, disulfide as acceptor"; "Hsp70 protein binding"	GO:0005737	cytoplasm	PF00085 PF00515	Thioredoxin; "Tetratricopeptide repeat"	PTHR22904 PTHR22904:SF34	CHAPERONE BINDING PROTEIN; "HSC70-INTERACTING PROTEIN"	KOG0907	Thioredoxin	NA	NA	NA	NA
Glyma08g39110	1460	UniRef100_I1KXC2 Uncharacterized protein n=1 Tax=Glycine max RepID=I1KXC2_SOYBN	0	99.93	UniRef100_B9SPI3 Alpha-glucan water dikinase, chloroplast, putative n=1 Tax=Ricinus communis RepID=B9SPI3_RICCO	0	99.93	AT1G10760.1 | Symbols: SEX1, SOP1, SOP, GWD1, GWD | Pyruvate phosphate dikinase, PEP/pyruvate binding domain | chr1:3581210-3590043 REVERSE LENGTH=1399	0	95.55	GO:0005982 GO:0005983 GO:0007623 GO:0009610 GO:0009631 GO:0010353 GO:0016310 GO:0019252	starch metabolic process; "starch catabolic process"; "circadian rhythm"; "response to symbiotic fungus"; "cold acclimation"; "response to trehalose stimulus"; "phosphorylation"; "starch biosynthetic process"	GO:0005515 GO:0005524 GO:0016301 GO:0050521	protein binding; "ATP binding"; "kinase activity"; "alpha-glucan, water dikinase activity"	GO:0005739 GO:0009507 GO:0009570 GO:0009941	mitochondrion; "chloroplast"; "chloroplast stroma"; "chloroplast envelope"	PF01326	Pyruvate phosphate dikinase, PEP/pyruvate binding domain	PTHR22931 PTHR22931:SF1	PHOSPHOENOLPYRUVATE DIKINASE-RELATED; "ALPHA-GLUCAN WATER DIKINASE, CHLOROPLAST PRECURSOR"	NA	NA	2.7.9.4	alpha-glucan,_water_dikinase	K08244	alpha-glucan,_water_dikinase_[EC:2.7.9.4]
Glyma09g31470	1239	UniRef100_I1L4B1 Uncharacterized protein n=1 Tax=Glycine max RepID=I1L4B1_SOYBN	0	99.92	UniRef100_G7KMZ7 Zinc finger protein-like protein n=1 Tax=Medicago truncatula RepID=G7KMZ7_MEDTR	0	99.84	AT3G18290.1 | Symbols: EMB2454, BTS | zinc finger protein-related | chr3:6274308-6280174 FORWARD LENGTH=1254	0	99.84	GO:0009793 GO:0010106	embryo development ending in seed dormancy; "cellular response to iron ion starvation"	GO:0008270	zinc ion binding	GO:0005634	nucleus	PF01814 PF05495	Hemerythrin HHE cation binding domain; "CHY zinc finger"	PTHR21319	RING FINGER AND CHY ZINC FINGER DOMAIN CONTAINING 1	KOG1940	Zn-finger_protein	NA	NA	NA	NA
Glyma10g02830	412	UniRef100_UPI000233C1F2 UPI000233C1F2 related cluster n=1 Tax=unknown RepID=UPI000233C1F2	0	99.76	UniRef100_C1L343 Rop-interacting receptor-like cytoplasmic kinase 2 n=1 Tax=Medicago truncatula RepID=C1L343_MEDTR	0	99.76	AT5G35960.1 | Symbols: | Protein kinase family protein | chr5:14108524-14110536 REVERSE LENGTH=429	0	98.3	GO:0006468	protein phosphorylation	GO:0004672 GO:0004674 GO:0005524 GO:0016301 GO:0016772	protein kinase activity; "protein serine/threonine kinase activity"; "ATP binding"; "kinase activity"; "transferase activity, transferring phosphorus-containing groups"	GO:0005576	extracellular region	PF00069	Protein kinase domain	PTHR24420 PTHR24420:SF794	FAMILY NOT NAMED; ""	KOG1187	Serine/threonine_protein_kinase	NA	NA	NA	NA
Glyma11g03500	382	UniRef100_I1LGP4 Uncharacterized protein n=2 Tax=Glycine max RepID=I1LGP4_SOYBN	0	99.74	UniRef100_G7JW26 Aspartic proteinase nepenthesin-2 n=1 Tax=Medicago truncatula RepID=G7JW26_MEDTR	0	99.74	AT4G16563.1 | Symbols: | Eukaryotic aspartyl protease family protein | chr4:9329933-9331432 REVERSE LENGTH=499	1e-170	98.69	GO:0006508	proteolysis	GO:0004190	aspartic-type endopeptidase activity	GO:0005576 GO:0009505	extracellular region; "plant-type cell wall"	PF00026	Eukaryotic aspartyl protease	PTHR13683 PTHR13683:SF98	ASPARTYL PROTEASES; "CHLOROPLAST NUCLEIOD DNA-BINDING-RELATED"	KOG1339	Aspartyl_protease	NA	NA	NA	NA
Glyma11g05160	147	UniRef100_C6TFI8 Uncharacterized protein n=1 Tax=Glycine max RepID=C6TFI8_SOYBN	3e-99	99.32	UniRef100_B9SH02 60S ribosomal protein L26, putative n=1 Tax=Ricinus communis RepID=B9SH02_RICCO	3e-91	99.32	AT3G49910.1 | Symbols: | Translation protein SH3-like family protein | chr3:18504311-18504751 FORWARD LENGTH=146	4e-91	99.32	GO:0001510 GO:0006412 GO:0009409	RNA methylation; "translation"; "response to cold"	GO:0003735	structural constituent of ribosome	GO:0005622 GO:0005634 GO:0005730 GO:0005774 GO:0005829 GO:0005840 GO:0005886 GO:0009507 GO:0015934 GO:0016020 GO:0022625 GO:0022626	intracellular; "nucleus"; "nucleolus"; "vacuolar membrane"; "cytosol"; "ribosome"; "plasma membrane"; "chloroplast"; "large ribosomal subunit"; "membrane"; "cytosolic large ribosomal subunit"; "cytosolic ribosome"	PF00467	KOW motif	PTHR11143	60S RIBOSOMAL PROTEIN L26 FAMILY MEMBER	KOG3401	60S_ribosomal_protein_L26	NA	NA	K02898	large_subunit_ribosomal_protein_L26e
Glyma11g07930	194	UniRef100_I1LHZ2 Uncharacterized protein n=1 Tax=Glycine max RepID=I1LHZ2_SOYBN	4e-142	99.48	UniRef100_G7KGE4 Zinc finger protein CONSTANS-like protein n=1 Tax=Medicago truncatula RepID=G7KGE4_MEDTR	1e-116	94.33	AT4G38960.1 | Symbols: | B-box type zinc finger family protein | chr4:18161576-18163045 FORWARD LENGTH=183	4e-73	94.33	GO:0006355 GO:0007623 GO:0009411 GO:0009813	regulation of transcription, DNA-dependent; "circadian rhythm"; "response to UV"; "flavonoid biosynthetic process"	GO:0003700 GO:0008270	sequence-specific DNA binding transcription factor activity; "zinc ion binding"	GO:0005622 GO:0005634	intracellular; "nucleus"	PF00643	B-box zinc finger	NA	NA	NA	NA	NA	NA	NA	NA
Glyma14g01930	548	UniRef100_I1M6I7 Uncharacterized protein n=1 Tax=Glycine max RepID=I1M6I7_SOYBN	0	99.82	UniRef100_G7K4G1 Zinc finger CCCH domain-containing protein n=1 Tax=Medicago truncatula RepID=G7K4G1_MEDTR	0	99.09	AT2G05160.1 | Symbols: | CCCH-type zinc fingerfamily protein with RNA-binding domain | chr2:1859011-1860931 REVERSE LENGTH=536	5e-119	97.45	GO:0008150	biological process	GO:0000166 GO:0003676 GO:0003723 GO:0008270	nucleotide binding; "nucleic acid binding"; "RNA binding"; "zinc ion binding"	GO:0005634	nucleus	PF00076 PF00642	RNA recognition motif. (a.k.a. RRM, RBD, or RNP domain); "Zinc finger C-x8-C-x5-C-x3-H type (and similar)"	PTHR24009 PTHR24009:SF14	FAMILY NOT NAMED; ""	NA	NA	NA	NA	NA	NA
Unique network induced by G2-LRB
Glyma01g01380	270	UniRef100_C6TGL4 Uncharacterized protein n=2 Tax=Glycine max RepID=C6TGL4_SOYBN	0	99.63	UniRef100_G7K9I4 Secretory carrier-associated membrane protein n=1 Tax=Medicago truncatula RepID=G7K9I4_MEDTR	4e-175	99.63	AT1G32050.1 | Symbols: | SCAMP family protein | chr1:11528616-11530974 FORWARD LENGTH=264	4e-149	99.63	GO:0006944 GO:0015031 GO:0016192	cellular membrane fusion; "protein transport"; "vesicle-mediated transport"	GO:0022857	transmembrane transporter activity	GO:0005739 GO:0005794 GO:0005886 GO:0016021	mitochondrion; "Golgi apparatus"; "plasma membrane"; "integral to membrane"	PF04144	SCAMP family	PTHR10687 PTHR10687:SF2	SECRETORY CARRIER MEMBRANE PROTEIN; "gb def: m01d7.2.p [caenorhabditis elegans]"	KOG3088	Secretory_carrier_membrane_protein	NA	NA	NA	NA
Glyma01g38930	253	UniRef100_I1J932 Uncharacterized protein n=2 Tax=Glycine max RepID=I1J932_SOYBN	0	99.6	UniRef100_G7K9G6 Protein disulfide-isomerase n=1 Tax=Medicago truncatula RepID=G7K9G6_MEDTR	9e-135	99.6	AT4G37200.1 | Symbols: HCF164 | Thioredoxin superfamily protein | chr4:17509836-17511230 REVERSE LENGTH=261	3e-110	99.6	GO:0006662 GO:0010190 GO:0019761 GO:0045454	glycerol ether metabolic process; "cytochrome b6f complex assembly"; "glucosinolate biosynthetic process"; "cell redox homeostasis"	GO:0009055 GO:0015035 GO:0016671	electron carrier activity; "protein disulfide oxidoreductase activity"; "oxidoreductase activity, acting on a sulfur group of donors, disulfide as acceptor"	GO:0009507 GO:0009534 GO:0009535 GO:0031977	chloroplast; "chloroplast thylakoid"; "chloroplast thylakoid membrane"; "thylakoid lumen"	PF00085	Thioredoxin	PTHR10438 PTHR10438:SF103	THIOREDOXIN-RELATED; "OS03G0767500 PROTEIN"	KOG0907	Thioredoxin	NA	NA	NA	NA
Glyma01g43470	672	UniRef100_I1JAD1 Uncharacterized protein n=1 Tax=Glycine max RepID=I1JAD1_SOYBN	0	99.85	UniRef100_G7KAK9 Annotation was added to scaffolds in November 2011 Long-chain-fatty-acid-CoA ligase n=1 Tax=Medicago truncatula RepID=G7KAK9_MEDTR	0	96.43	AT4G23850.1 | Symbols: LACS4 | AMP-dependent synthetase and ligase family protein | chr4:12403720-12408263 REVERSE LENGTH=666	0	95.98	GO:0001676 GO:0002213 GO:0006631 GO:0006633 GO:0009611 GO:0009805	long-chain fatty acid metabolic process; "defense response to insect"; "fatty acid metabolic process"; "fatty acid biosynthetic process"; "response to wounding"; "coumarin biosynthetic process"	GO:0003824 GO:0004467	catalytic activity; "long-chain fatty acid-CoA ligase activity"	GO:0005634 GO:0005794 GO:0005886	nucleus; "Golgi apparatus"; "plasma membrane"	PF00501	AMP-binding enzyme	PTHR24096	FAMILY NOT NAMED	KOG1256	Long-chain_acyl-CoA_synthetases_(AMP-forming)	6.2.1.3	Long-chain-fatty-acid--CoA_ligase.	K01897	long-chain_acyl-CoA_synthetase_[EC:6.2.1.3]
Glyma02g36070	141	UniRef100_I1JGK9 Uncharacterized protein n=1 Tax=Glycine max RepID=I1JGK9_SOYBN	6e-96	99.29	UniRef100_I3NMJ2 40S ribosomal protein S17C n=1 Tax=Hevea brasiliensis RepID=I3NMJ2_HEVBR	4e-81	99.29	AT5G04800.4 | Symbols: | Ribosomal S17 family protein | chr5:1389217-1389642 FORWARD LENGTH=141	2e-79	99.29	GO:0000028 GO:0006412 GO:0006414	ribosomal small subunit assembly; "translation"; "translational elongation"	GO:0003735	structural constituent of ribosome	GO:0005622 GO:0005737 GO:0005840 GO:0022627	intracellular; "cytoplasm"; "ribosome"; "cytosolic small ribosomal subunit"	PF00833	Ribosomal S17	PTHR10732	40S RIBOSOMAL PROTEIN S17	KOG0187	40S_ribosomal_protein_S17	NA	NA	K02962	small_subunit_ribosomal_protein_S17e
Glyma04g32460	321	UniRef100_C6T8L7 Uncharacterized protein n=1 Tax=Glycine max RepID=C6T8L7_SOYBN	0	99.69	UniRef100_I1JWP6 ATP synthase gamma chain n=1 Tax=Glycine max RepID=I1JWP6_SOYBN	0	99.69	AT2G33040.1 | Symbols: ATP3 | gamma subunit of Mt ATP synthase | chr2:14018978-14021047 REVERSE LENGTH=325	0	99.69	GO:0006511 GO:0009853 GO:0015986 GO:0015992 GO:0019243 GO:0051788 GO:0080129	ubiquitin-dependent protein catabolic process; "photorespiration"; "ATP synthesis coupled proton transport"; "proton transport"; "methylglyoxal catabolic process to D-lactate"; "response to misfolded protein"; "proteasome core complex assembly"	GO:0008270 GO:0046933 GO:0046961	zinc ion binding; "hydrogen ion transporting ATP synthase activity, rotational mechanism"; "proton-transporting ATPase activity, rotational mechanism"	GO:0005618 GO:0005634 GO:0005730 GO:0005737 GO:0005739 GO:0005753 GO:0009507 GO:0016020 GO:0045261	cell wall; "nucleus"; "nucleolus"; "cytoplasm"; "mitochondrion"; "mitochondrial proton-transporting ATP synthase complex"; "chloroplast"; "membrane"; "proton-transporting ATP synthase complex, catalytic core F(1)"	PF00231	ATP synthase	PTHR11693 PTHR11693:SF4	ATP SYNTHASE GAMMA CHAIN; "ATP SYNTHASE GAMMA-RELATED"	KOG1531	F0F1-type_ATP_synthase,_gamma_subunit	3.6.3.14	H(+)-transporting_two-sector_ATPase	K02136	F-type_H+-transporting_ATPase_subunit_gamma_[EC:3.6.3.14]
Glyma05g30870	392	UniRef100_I1K4G0 Uncharacterized protein n=2 Tax=Glycine max RepID=I1K4G0_SOYBN	0	99.74	UniRef100_G7JBJ5 Beta-1,4-mannosyl-glycoprotein 4-beta-N-acetylglucosaminyltransferase n=1 Tax=Medicago truncatula RepID=G7JBJ5_MEDTR	0	93.11	AT1G12990.1 | Symbols: | beta-1,4-N-acetylglucosaminyltransferase family protein | chr1:4433973-4435552 FORWARD LENGTH=392	0	99.49	GO:0006487	protein N-linked glycosylation	GO:0003830 GO:0008375 GO:0016757	beta-1,4-mannosylglycoprotein 4-beta-N-acetylglucosaminyltransferase activity; "acetylglucosaminyltransferase activity"; "transferase activity, transferring glycosyl groups"	GO:0005794 GO:0016020	Golgi apparatus; "membrane"	PF04724	Glycosyltransferase family 17	PTHR12224	BETA-1,4-MANNOSYL-GLYCOPROTEIN BETA-1,4-N-ACETYLGLUCOSAMINYL-TRANSFERASE	NA	NA	2.4.1.144	Beta-1,4-mannosyl-glycoprotein_beta-1,4-N-acetylglucosaminyltransferase.	K00737	beta-1,4-mannosyl-glycoprotein_beta-1,4-N-acetylglucosaminyltransferase_[EC:2.4.1.144]
Glyma08g18760	593	UniRef100_UPI00018C6834 UPI00018C6834 related cluster n=1 Tax=unknown RepID=UPI00018C6834	0	99.83	UniRef100_P08927 RuBisCO large subunit-binding protein subunit beta, chloroplastic n=1 Tax=Pisum sativum RepID=RUBB_PEA	0	99.16	AT3G13470.1 | Symbols: | TCP-1/cpn60 chaperonin family protein | chr3:4389685-4392624 FORWARD LENGTH=596	0	99.16	GO:0006457 GO:0009658 GO:0042026 GO:0044267 GO:0048481	protein folding; "chloroplast organization"; "protein refolding"; "cellular protein metabolic process"; "ovule development"	GO:0005524	ATP binding	GO:0005634 GO:0005730 GO:0005737 GO:0005739 GO:0009507 GO:0009570 GO:0009941 GO:0022626	nucleus; "nucleolus"; "cytoplasm"; "mitochondrion"; "chloroplast"; "chloroplast stroma"; "chloroplast envelope"; "cytosolic ribosome"	PF00118	TCP-1/cpn60 chaperonin family	PTHR11353 PTHR11353:SF8	CHAPERONIN; "RUBISCO SUBUNIT BINDING-PROTEIN BETA SUBUNIT, RUBB"	KOG0356	Mitochondrial_chaperonin,_Cpn60/Hsp60p	NA	NA	NA	NA
Glyma08g39110	1460	UniRef100_I1KXC2 Uncharacterized protein n=1 Tax=Glycine max RepID=I1KXC2_SOYBN	0	99.93	UniRef100_B9SPI3 Alpha-glucan water dikinase, chloroplast, putative n=1 Tax=Ricinus communis RepID=B9SPI3_RICCO	0	99.93	AT1G10760.1 | Symbols: SEX1, SOP1, SOP, GWD1, GWD | Pyruvate phosphate dikinase, PEP/pyruvate binding domain | chr1:3581210-3590043 REVERSE LENGTH=1399	0	95.55	GO:0005982 GO:0005983 GO:0007623 GO:0009610 GO:0009631 GO:0010353 GO:0016310 GO:0019252	starch metabolic process; "starch catabolic process"; "circadian rhythm"; "response to symbiotic fungus"; "cold acclimation"; "response to trehalose stimulus"; "phosphorylation"; "starch biosynthetic process"	GO:0005515 GO:0005524 GO:0016301 GO:0050521	protein binding; "ATP binding"; "kinase activity"; "alpha-glucan, water dikinase activity"	GO:0005739 GO:0009507 GO:0009570 GO:0009941	mitochondrion; "chloroplast"; "chloroplast stroma"; "chloroplast envelope"	PF01326	Pyruvate phosphate dikinase, PEP/pyruvate binding domain	PTHR22931 PTHR22931:SF1	PHOSPHOENOLPYRUVATE DIKINASE-RELATED; "ALPHA-GLUCAN WATER DIKINASE, CHLOROPLAST PRECURSOR"	NA	NA	2.7.9.4	alpha-glucan,_water_dikinase	K08244	alpha-glucan,_water_dikinase_[EC:2.7.9.4]
Glyma10g27570	206	UniRef100_I1LAR7 Uncharacterized protein n=1 Tax=Glycine max RepID=I1LAR7_SOYBN	4e-151	99.51	UniRef100_D3TI64 Eukaryotic translation initiation factor iso4E n=2 Tax=Phaseolus vulgaris RepID=D3TI64_PHAVU	2e-125	90.29	AT5G35620.1 | Symbols: LSP1, EIF(ISO)4E, LSP, EIF4E2, eIFiso4E | Eukaryotic initiation factor 4E protein | chr5:13824946-13826331 REVERSE LENGTH=198	6e-82	99.51	GO:0006413 GO:0009615 GO:0050687	translational initiation; "response to virus"; "negative regulation of defense response to virus"	GO:0000340 GO:0003723 GO:0003743 GO:0005515	RNA 7-methylguanosine cap binding; "RNA binding"; "translation initiation factor activity"; "protein binding"	GO:0005634 GO:0005737 GO:0005829	nucleus; "cytoplasm"; "cytosol"	PF01652	Eukaryotic initiation factor 4E	PTHR11960	EUKARYOTIC TRANSLATION INITIATION FACTOR 4E RELATED	KOG1670	Translation_initiation_factor_4F,_cap-binding_subunit_(eIF-4E)_and_related_cap-binding_proteins	NA	NA	NA	NA
Glyma10g38590	629	UniRef100_I1LDX0 Uncharacterized protein n=1 Tax=Glycine max RepID=I1LDX0_SOYBN	0	99.84	UniRef100_G7IC40 Phosphoglucomutase n=1 Tax=Medicago truncatula RepID=G7IC40_MEDTR	0	99.84	AT5G51820.1 | Symbols: PGM, ATPGMP, PGM1, STF1 | phosphoglucomutase | chr5:21063531-21067933 REVERSE LENGTH=623	0	95.39	GO:0000023 GO:0000272 GO:0005975 GO:0005982 GO:0005992 GO:0006098 GO:0006874 GO:0009409 GO:0009590 GO:0009664 GO:0019252 GO:0019255 GO:0019288 GO:0019388 GO:0019760 GO:0019761 GO:0042742 GO:0043085	maltose metabolic process; "polysaccharide catabolic process"; "carbohydrate metabolic process"; "starch metabolic process"; "trehalose biosynthetic process"; "pentose-phosphate shunt"; "cellular calcium ion homeostasis"; "response to cold"; "detection of gravity"; "plant-type cell wall organization"; "starch biosynthetic process"; "glucose 1-phosphate metabolic process"; "isopentenyl diphosphate…	GO:0000287 GO:0004614 GO:0016868	magnesium ion binding; "phosphoglucomutase activity"; "intramolecular transferase activity, phosphotransferases"	GO:0005739 GO:0005829 GO:0009507 GO:0009570 GO:0009941 GO:0010319 GO:0048046	mitochondrion; "cytosol"; "chloroplast"; "chloroplast stroma"; "chloroplast envelope"; "stromule"; "apoplast"	PF02879 PF00408 PF02880 PF02878	Phosphoglucomutase/phosphomannomutase, alpha/beta/alpha domain II; "Phosphoglucomutase/phosphomannomutase, C-terminal domain"; "Phosphoglucomutase/phosphomannomutase, alpha/beta/alpha domain III"; "Phosphoglucomutase/phosphomannomutase, alpha/beta/alpha domain I"	PTHR22573 PTHR22573:SF5	PHOSPHOHEXOMUTASE FAMILY MEMBER; "PHOSPHOGLUCOMUTASE"	KOG0625	Phosphoglucomutase	5.4.2.2	Phosphoglucomutase	K01835	phosphoglucomutase_[EC:5.4.2.2]
Glyma11g03500	382	UniRef100_I1LGP4 Uncharacterized protein n=2 Tax=Glycine max RepID=I1LGP4_SOYBN	0	99.74	UniRef100_G7JW26 Aspartic proteinase nepenthesin-2 n=1 Tax=Medicago truncatula RepID=G7JW26_MEDTR	0	99.74	AT4G16563.1 | Symbols: | Eukaryotic aspartyl protease family protein | chr4:9329933-9331432 REVERSE LENGTH=499	1e-170	98.69	GO:0006508	proteolysis	GO:0004190	aspartic-type endopeptidase activity	GO:0005576 GO:0009505	extracellular region; "plant-type cell wall"	PF00026	Eukaryotic aspartyl protease	PTHR13683 PTHR13683:SF98	ASPARTYL PROTEASES; "CHLOROPLAST NUCLEIOD DNA-BINDING-RELATED"	KOG1339	Aspartyl_protease	NA	NA	NA	NA
Glyma11g05160	147	UniRef100_C6TFI8 Uncharacterized protein n=1 Tax=Glycine max RepID=C6TFI8_SOYBN	3e-99	99.32	UniRef100_B9SH02 60S ribosomal protein L26, putative n=1 Tax=Ricinus communis RepID=B9SH02_RICCO	3e-91	99.32	AT3G49910.1 | Symbols: | Translation protein SH3-like family protein | chr3:18504311-18504751 FORWARD LENGTH=146	4e-91	99.32	GO:0001510 GO:0006412 GO:0009409	RNA methylation; "translation"; "response to cold"	GO:0003735	structural constituent of ribosome	GO:0005622 GO:0005634 GO:0005730 GO:0005774 GO:0005829 GO:0005840 GO:0005886 GO:0009507 GO:0015934 GO:0016020 GO:0022625 GO:0022626	intracellular; "nucleus"; "nucleolus"; "vacuolar membrane"; "cytosol"; "ribosome"; "plasma membrane"; "chloroplast"; "large ribosomal subunit"; "membrane"; "cytosolic large ribosomal subunit"; "cytosolic ribosome"	PF00467	KOW motif	PTHR11143	60S RIBOSOMAL PROTEIN L26 FAMILY MEMBER	KOG3401	60S_ribosomal_protein_L26	NA	NA	K02898	large_subunit_ribosomal_protein_L26e
Glyma11g07590	290	UniRef100_I1LHV8 Uncharacterized protein n=1 Tax=Glycine max RepID=I1LHV8_SOYBN	0	99.66	UniRef100_F4J220 Phosphatidic acid phosphatase (PAP2) family protein n=2 Tax=Arabidopsis thaliana RepID=F4J220_ARATH	5e-61	74.14	AT5G66450.1 | Symbols: | Phosphatidic acid phosphatase (PAP2) family protein | chr5:26534801-26535951 FORWARD LENGTH=286	3e-68	78.28	GO:0006464 GO:0006651	cellular protein modification process; "diacylglycerol biosynthetic process"	GO:0003824 GO:0008195 GO:0008474	catalytic activity; "phosphatidate phosphatase activity"; "palmitoyl-(protein) hydrolase activity"	GO:0009507 GO:0016020	chloroplast; "membrane"	PF01569	PAP2 superfamily	PTHR11247 PTHR11247:SF3	PALMITOYL-PROTEIN THIOESTERASE/DOLICHYLDIPHOSPHATASE 1; "PALMITOYL PROTEIN THIOESTERASE-RELATED"	KOG3146	Dolichyl_pyrophosphate_phosphatase_and_related_acid_phosphatases	NA	NA	NA	NA
Glyma11g37820	393	UniRef100_I1LNG9 Uncharacterized protein n=1 Tax=Glycine max RepID=I1LNG9_SOYBN	0	99.75	UniRef100_G7JBJ5 Beta-1,4-mannosyl-glycoprotein 4-beta-N-acetylglucosaminyltransferase n=1 Tax=Medicago truncatula RepID=G7JBJ5_MEDTR	0	92.62	AT1G12990.1 | Symbols: | beta-1,4-N-acetylglucosaminyltransferase family protein | chr1:4433973-4435552 FORWARD LENGTH=392	0	99.49	GO:0006487	protein N-linked glycosylation	GO:0003830 GO:0008375 GO:0016757	beta-1,4-mannosylglycoprotein 4-beta-N-acetylglucosaminyltransferase activity; "acetylglucosaminyltransferase activity"; "transferase activity, transferring glycosyl groups"	GO:0005794 GO:0016020	Golgi apparatus; "membrane"	PF04724	Glycosyltransferase family 17	PTHR12224	BETA-1,4-MANNOSYL-GLYCOPROTEIN BETA-1,4-N-ACETYLGLUCOSAMINYL-TRANSFERASE	NA	NA	2.4.1.144	Beta-1,4-mannosyl-glycoprotein_beta-1,4-N-acetylglucosaminyltransferase	K00737	beta-1,4-mannosyl-glycoprotein_beta-1,4-N-acetylglucosaminyltransferase_[EC:2.4.1.144]
Glyma12g03230	260	UniRef100_I1LPL2 Uncharacterized protein n=1 Tax=Glycine max RepID=I1LPL2_SOYBN	0	99.62	UniRef100_P35685 60S ribosomal protein L7a n=4 Tax=Oryza RepID=RL7A_ORYSJ	2e-167	99.62	AT3G62870.1 | Symbols: | Ribosomal protein L7Ae/L30e/S12e/Gadd45 family protein | chr3:23242862-23244273 REVERSE LENGTH=256	1e-165	99.62	GO:0001510 GO:0006412 GO:0042254	RNA methylation; "translation"; "ribosome biogenesis"	GO:0003735	structural constituent of ribosome	GO:0005737 GO:0005774 GO:0005829 GO:0016020 GO:0022625 GO:0022626 GO:0030529	cytoplasm; "vacuolar membrane"; "cytosol"; "membrane"; "cytosolic large ribosomal subunit"; "cytosolic ribosome"; "ribonucleoprotein complex"	PF01248	Ribosomal protein L7Ae/L30e/S12e/Gadd45 family	PTHR23105 PTHR23105:SF1	60S RIBOSOMAL PROTEIN L10A - RELATED; "60S RIBOSOMAL PROTEIN L7A"	KOG3166	60S_ribosomal_protein_L7A	NA	NA	K02936	large_subunit_ribosomal_protein_L7Ae
Glyma12g08440	297	UniRef100_I1LR70 Uncharacterized protein n=1 Tax=Glycine max RepID=I1LR70_SOYBN	0	99.66	UniRef100_B9SCH8 Metal ion binding protein, putative n=1 Tax=Ricinus communis RepID=B9SCH8_RICCO	1e-58	92.93	AT5G60800.1 | Symbols: | Heavy metal transport/detoxification superfamily protein | chr5:24461116-24462464 REVERSE LENGTH=283	7e-55	93.94	GO:0030001	metal ion transport	GO:0046872	metal ion binding	GO:0005886	plasma membrane	PF00403	Heavy-metal-associated domain	PTHR22814 PTHR22814:SF13	COPPER TRANSPORT PROTEIN ATOX1-RELATED; "COPPER CHAPERONE-RELATED"	KOG1603	Copper_chaperone	NA	NA	NA	NA
Glyma13g24340	1009	UniRef100_I1M066 Uncharacterized protein n=2 Tax=Glycine max RepID=I1M066_SOYBN	0	97.62	UniRef100_Q6J330 Leucine-rich repeat receptor-like protein kinase (Fragment) n=1 Tax=Pyrus pyrifolia RepID=Q6J330_PYRPY	0	97.82	AT1G28440.1 | Symbols: HSL1 | HAESA-like 1 | chr1:9996914-10000171 FORWARD LENGTH=996	0	97.22	GO:0000271 GO:0006468 GO:0007020 GO:0007169 GO:0007389 GO:0008361 GO:0009664 GO:0009825 GO:0009832 GO:0009926 GO:0009932 GO:0010015 GO:0010075 GO:0010817 GO:0040007 GO:0043481 GO:0048653 GO:0048767 GO:0071555	polysaccharide biosynthetic process; "protein phosphorylation"; "microtubule nucleation"; "transmembrane receptor protein tyrosine kinase signaling pathway"; "pattern specification process"; "regulation of cell size"; "plant-type cell wall organization"; "multidimensional cell growth"; "plant-type cell wall biogenesis"; "auxin polar transport"; "cell tip growth"; "root morphogenesis"; "regulation…	GO:0004672 GO:0004674 GO:0005524 GO:0016301 GO:0016772	protein kinase activity; "protein serine/threonine kinase activity"; "ATP binding"; "kinase activity"; "transferase activity, transferring phosphorus-containing groups"	GO:0005886	plasma membrane	PF00560 PF08263 PF00069	Leucine Rich Repeat; "Leucine rich repeat N-terminal domain"; "Protein kinase domain"	PTHR24420 PTHR24420:SF884	FAMILY NOT NAMED; ""	KOG1187	Serine/threonine_protein_kinase	2.7.1.-	Phosphotransferases_with_an_alcohol_group_as_acceptor	K00924	phosphatidylinositol-4-phosphate_3-kinase_[EC:2.7.1.154]
Glyma13g29270	725	UniRef100_I1M1I9 Uncharacterized protein n=1 Tax=Glycine max RepID=I1M1I9_SOYBN	0	99.86	UniRef100_G7IP43 Early-responsive to dehydration n=1 Tax=Medicago truncatula RepID=G7IP43_MEDTR	0	99.31	AT1G30360.1 | Symbols: ERD4 | Early-responsive to dehydration stress protein (ERD4) | chr1:10715892-10718799 FORWARD LENGTH=724	0	98.9	NA	NA	NA	NA	GO:0005576 GO:0005773 GO:0005774 GO:0005886 GO:0009506 GO:0009507 GO:0009941 GO:0016020	extracellular region; "vacuole"; "vacuolar membrane"; "plasma membrane"; "plasmodesma"; "chloroplast"; "chloroplast envelope"; "membrane"	PF02714	Domain of unknown function DUF221	PTHR13018 PTHR13018:SF5	PROBABLE MEMBRANE PROTEIN DUF221-RELATED; "RSN1(YEAST)-RELATED PROBABLE MEMBRANE PROTEIN"	KOG1134	Uncharacterized_conserved_protein	NA	NA	NA	NA
Glyma13g39830	808	UniRef100_P54774 Cell division cycle protein 48 homolog n=2 Tax=Glycine max RepID=CDC48_SOYBN	0	99.88	UniRef100_P54774 Cell division cycle protein 48 homolog n=2 Tax=Glycine max RepID=CDC48_SOYBN	0	99.88	AT5G03340.1 | Symbols: | ATPase, AAA-type, CDC48 protein | chr5:810091-813133 REVERSE LENGTH=810	0	99.88	NA	NA	GO:0000166 GO:0005515 GO:0005524 GO:0016787 GO:0016887 GO:0017111	nucleotide binding; "protein binding"; "ATP binding"; "hydrolase activity"; "ATPase activity"; "nucleoside-triphosphatase activity"	GO:0005618 GO:0005634 GO:0005794 GO:0005829	cell wall; "nucleus"; "Golgi apparatus"; "cytosol"	PF02359 PF02933 PF00004	Cell division protein 48 (CDC48), N-terminal domain; "Cell division protein 48 (CDC48), domain 2"; "ATPase family associated with various cellular activities (AAA)"	PTHR23077 PTHR23077:SF18	AAA-FAMILY ATPASE; "CELL DIVISION CONTROL PROTEIN 48 AAA FAMILY PROTEIN (TRANSITIONAL ENDOPLASMIC RETICULUM ATPASE)"	KOG0730	AAA+-type_ATPase	NA	NA	K13525	transitional_endoplasmic_reticulum_ATPase
Glyma14g00880	1023	UniRef100_I1M679 Uncharacterized protein n=2 Tax=Glycine max RepID=I1M679_SOYBN	0	96.68	UniRef100_G7K4Y8 Nuclear pore complex protein Nup98-Nup96 n=1 Tax=Medicago truncatula RepID=G7K4Y8_MEDTR	0	99.9	AT1G80680.1 | Symbols: SAR3, MOS3, PRE, NUP96 | SUPPRESSOR OF AUXIN RESISTANCE 3 | chr1:30324219-30328489 FORWARD LENGTH=1046	0	98.34	GO:0000394 GO:0006406 GO:0006606 GO:0006810 GO:0009086 GO:0009733 GO:0009870 GO:0009909 GO:0009910 GO:0010074 GO:0032502	RNA splicing, via endonucleolytic cleavage and ligation; "mRNA export from nucleus"; "protein import into nucleus"; "transport"; "methionine biosynthetic process"; "response to auxin stimulus"; "defense response signaling pathway, resistance gene-dependent"; "regulation of flower development"; "negative regulation of flower development"; "maintenance of meristem identity"; "developmental process"	GO:0005515 GO:0015288	protein binding; "porin activity"	GO:0005634 GO:0005635 GO:0031965	nucleus; "nuclear envelope"; "nuclear membrane"	PF04096 PF12110	Nucleoporin autopeptidase; "Nuclear protein 96"	PTHR23198	NUCLEOPORIN	NA	NA	NA	NA	NA	NA
Unique network induced by G7
Glyma02g36070	141	UniRef100_I1JGK9 Uncharacterized protein n=1 Tax=Glycine max RepID=I1JGK9_SOYBN	6e-96	99.29	UniRef100_I3NMJ2 40S ribosomal protein S17C n=1 Tax=Hevea brasiliensis RepID=I3NMJ2_HEVBR	4e-81	99.29	AT5G04800.4 | Symbols: | Ribosomal S17 family protein | chr5:1389217-1389642 FORWARD LENGTH=141	2e-79	99.29	GO:0000028 GO:0006412 GO:0006414	ribosomal small subunit assembly; "translation"; "translational elongation"	GO:0003735	structural constituent of ribosome	GO:0005622 GO:0005737 GO:0005840 GO:0022627	intracellular; "cytoplasm"; "ribosome"; "cytosolic small ribosomal subunit"	PF00833	Ribosomal S17	PTHR10732	40S RIBOSOMAL PROTEIN S17	KOG0187	40S_ribosomal_protein_S17	NA	NA	K02962	small_subunit_ribosomal_protein_S17e
Glyma07g04080	677	UniRef100_I1KH92 Uncharacterized protein n=1 Tax=Glycine max RepID=I1KH92_SOYBN	0	99.85	UniRef100_Q6XSH3 Lecithine cholesterol acyltransferase-like protein n=1 Tax=Medicago truncatula RepID=Q6XSH3_MEDTR	0	99.85	AT5G13640.1 | Symbols: ATPDAT, PDAT, PDAT1 | phospholipid:diacylglycerol acyltransferase | chr5:4393529-4397213 FORWARD LENGTH=671	0	99.85	GO:0006629	lipid metabolic process	GO:0004607 GO:0008374 GO:0046027	phosphatidylcholine-sterol O-acyltransferase activity; "O-acyltransferase activity"; "phospholipid:diacylglycerol acyltransferase activity"	GO:0005634 GO:0005773 GO:0005783	nucleus; "vacuole"; "endoplasmic reticulum"	PF02450	Lecithin:cholesterol acyltransferase	PTHR11440 PTHR11440:SF6	LECITHIN-CHOLESTEROL ACYLTRANSFERASE-RELATED; "PHOSPHATIDYLCHOLINE-STEROL ACYLTRANSFERASE-RELATED"	NA	NA	NA	NA	NA	NA
Glyma08g05480	1178	UniRef100_I1KQG1 Uncharacterized protein n=1 Tax=Glycine max RepID=I1KQG1_SOYBN	0	99.92	UniRef100_G7LCG1 ATP-dependent RNA helicase A-like protein n=1 Tax=Medicago truncatula RepID=G7LCG1_MEDTR	0	97.79	AT1G48650.1 | Symbols: | DEA(D/H)-box RNA helicase family protein | chr1:17989670-17995169 REVERSE LENGTH=1197	0	99.49	NA	NA	GO:0003676 GO:0003723 GO:0003725 GO:0004386 GO:0005524 GO:0008026	nucleic acid binding; "RNA binding"; "double-stranded RNA binding"; "helicase activity"; "ATP binding"; "ATP-dependent helicase activity"	GO:0005622	intracellular	PF04408 PF00271 PF00035 PF07717 PF00270	Helicase associated domain (HA2); "Helicase conserved C-terminal domain"; "Double-stranded RNA binding motif"; "Domain of unknown function (DUF1605)"; "DEAD/DEAH box helicase"	PTHR18934 PTHR18934:SF68	ATP-DEPENDENT RNA HELICASE; "SUBFAMILY NOT NAMED"	KOG0920	ATP-dependent_RNA_helicase_A	NA	NA	NA	NA
Glyma08g40810	923	UniRef100_UPI0002338875 UPI0002338875 related cluster n=1 Tax=unknown RepID=UPI0002338875	0	99.89	UniRef100_B9S2B5 Alpha-amylase, putative n=1 Tax=Ricinus communis RepID=B9S2B5_RICCO	0	99.67	AT1G69830.1 | Symbols: ATAMY3, AMY3 | alpha-amylase-like 3 | chr1:26288518-26293003 REVERSE LENGTH=887	0	92.42	GO:0005975 GO:0005982 GO:0005983 GO:0007623	carbohydrate metabolic process; "starch metabolic process"; "starch catabolic process"; "circadian rhythm"	GO:0003824 GO:0004556 GO:0005509 GO:0043169	catalytic activity; "alpha-amylase activity"; "calcium ion binding"; "cation binding"	GO:0005576 GO:0009507 GO:0009570	extracellular region; "chloroplast"; "chloroplast stroma"	PF07821 PF00128	Alpha-amylase C-terminal beta-sheet domain; "Alpha amylase, catalytic domain"	PTHR10357 PTHR10357:SF9	AMYLASE; "ALPHA-XYLOSIDASE-RELATED"	KOG0471	Alpha-amylase	NA	NA	NA	NA
Glyma10g38590	629	UniRef100_I1LDX0 Uncharacterized protein n=1 Tax=Glycine max RepID=I1LDX0_SOYBN	0	99.84	UniRef100_G7IC40 Phosphoglucomutase n=1 Tax=Medicago truncatula RepID=G7IC40_MEDTR	0	99.84	AT5G51820.1 | Symbols: PGM, ATPGMP, PGM1, STF1 | phosphoglucomutase | chr5:21063531-21067933 REVERSE LENGTH=623	0	95.39	GO:0000023 GO:0000272 GO:0005975 GO:0005982 GO:0005992 GO:0006098 GO:0006874 GO:0009409 GO:0009590 GO:0009664 GO:0019252 GO:0019255 GO:0019288 GO:0019388 GO:0019760 GO:0019761 GO:0042742 GO:0043085	maltose metabolic process; "polysaccharide catabolic process"; "carbohydrate metabolic process"; "starch metabolic process"; "trehalose biosynthetic process"; "pentose-phosphate shunt"; "cellular calcium ion homeostasis"; "response to cold"; "detection of gravity"; "plant-type cell wall organization"; "starch biosynthetic process"; "glucose 1-phosphate metabolic process"; "isopentenyl diphosphate…	GO:0000287 GO:0004614 GO:0016868	magnesium ion binding; "phosphoglucomutase activity"; "intramolecular transferase activity, phosphotransferases"	GO:0005739 GO:0005829 GO:0009507 GO:0009570 GO:0009941 GO:0010319 GO:0048046	mitochondrion; "cytosol"; "chloroplast"; "chloroplast stroma"; "chloroplast envelope"; "stromule"; "apoplast"	PF02879 PF00408 PF02880 PF02878	Phosphoglucomutase/phosphomannomutase, alpha/beta/alpha domain II; "Phosphoglucomutase/phosphomannomutase, C-terminal domain"; "Phosphoglucomutase/phosphomannomutase, alpha/beta/alpha domain III"; "Phosphoglucomutase/phosphomannomutase, alpha/beta/alpha domain I"	PTHR22573 PTHR22573:SF5	PHOSPHOHEXOMUTASE FAMILY MEMBER; "PHOSPHOGLUCOMUTASE"	KOG0625	Phosphoglucomutase	5.4.2.2	Phosphoglucomutase	K01835	phosphoglucomutase_[EC:5.4.2.2]
Glyma11g01800	899	UniRef100_I1LG61 Uncharacterized protein n=1 Tax=Glycine max RepID=I1LG61_SOYBN	0	99.89	UniRef100_G7JQK3 AP-2 complex subunit beta n=1 Tax=Medicago truncatula RepID=G7JQK3_MEDTR	0	99.67	AT4G23460.1 | Symbols: | Adaptin family protein | chr4:12243899-12248898 REVERSE LENGTH=893	0	99.67	GO:0006886 GO:0015031 GO:0016192	intracellular protein transport; "protein transport"; "vesicle-mediated transport"	GO:0008565 GO:0030276	protein transporter activity; "clathrin binding"	GO:0005634 GO:0005886 GO:0009506 GO:0030117 GO:0030131	nucleus; "plasma membrane"; "plasmodesma"; "membrane coat"; "clathrin adaptor complex"	PF01602 PF09066 PF02883	Adaptin N terminal region; "Beta2-adaptin appendage, C-terminal sub-domain"; "Adaptin C-terminal domain"	PTHR11134	ADAPTER-RELATED PROTEIN COMPLEX, BETA SUBUNIT	KOG1061	Vesicle_coat_complex_AP-1/AP-2/AP-4,_beta_subunit	NA	NA	K12392	AP-1_complex_subunit_beta-1
Glyma12g09390	816	UniRef100_Q9SWB4 Poly [ADP-ribose] polymerase 3 n=1 Tax=Glycine max RepID=PARP3_SOYBN	0	99.88	UniRef100_Q9SWB4 Poly [ADP-ribose] polymerase 3 n=1 Tax=Glycine max RepID=PARP3_SOYBN	0	99.88	AT5G22470.1 | Symbols: | NAD+ ADP-ribosyltransferases;NAD+ ADP-ribosyltransferases | chr5:7447045-7450743 FORWARD LENGTH=814	0	98.53	GO:0006471	protein ADP-ribosylation	GO:0003950	NAD+ ADP-ribosyltransferase activity	GO:0005622 GO:0005634	intracellular; "nucleus"	PF02877 PF05406 PF00533 PF00644 PF08063	Poly(ADP-ribose) polymerase, regulatory domain; "WGR domain"; "BRCA1 C Terminus (BRCT) domain"; "Poly(ADP-ribose) polymerase catalytic domain"; "PADR1 (NUC008) domain"	PTHR15447	POLY [ADP-RIBOSE] POLYMERASE	NA	NA	NA	NA	NA	NA
Glyma12g30650	95	UniRef100_I1LTR7 Uncharacterized protein n=1 Tax=Glycine max RepID=I1LTR7_SOYBN	7e-61	98.95	UniRef100_Q5IVZ8 Phytosulfokine n=1 Tax=Avicennia marina RepID=Q5IVZ8_AVIMR	2e-07	88.42	AT3G44735.2 | Symbols: PSK3 | PHYTOSULFOKINE 3 PRECURSOR | chr3:16291388-16292118 REVERSE LENGTH=81	1e-15	87.37	GO:0008283	cell proliferation	GO:0008083	growth factor activity	GO:0005576	extracellular region	PF06404	Phytosulfokine precursor protein (PSK)	NA	NA	NA	NA	NA	NA	NA	NA
Glyma13g05700	516	UniRef100_I1LWN0 Uncharacterized protein n=1 Tax=Glycine max RepID=I1LWN0_SOYBN	0	99.81	UniRef100_Q9XF25 SNF-1-like serine/threonine protein kinase n=1 Tax=Glycine max RepID=Q9XF25_SOYBN	0	99.81	AT3G01090.2 | Symbols: AKIN10, KIN10 | SNF1 kinase homolog 10 | chr3:31437-34143 REVERSE LENGTH=535	0	99.03	GO:0003006 GO:0006007 GO:0006468 GO:0006486 GO:0009594 GO:0009738 GO:0010050 GO:0010182 GO:0010260 GO:0080022	developmental process involved in reproduction; "glucose catabolic process"; "protein phosphorylation"; "protein glycosylation"; "detection of nutrient"; "abscisic acid mediated signaling pathway"; "vegetative phase change"; "sugar mediated signaling pathway"; "organ senescence"; "primary root development"	GO:0004672 GO:0004674 GO:0005515	protein kinase activity; "protein serine/threonine kinase activity"; "protein binding"	GO:0000152 GO:0005634	nuclear ubiquitin ligase complex; "nucleus"	PF00069 PF02149 PF00627	Protein kinase domain; "Kinase associated domain 1"; "UBA/TS-N domain"	PTHR24343 PTHR24343:SF123	SERINE/THREONINE KINASE; ""	KOG0583	Serine/threonine_protein_kinase	NA	NA	NA	NA
Glyma13g29270	725	UniRef100_I1M1I9 Uncharacterized protein n=1 Tax=Glycine max RepID=I1M1I9_SOYBN	0	99.86	UniRef100_G7IP43 Early-responsive to dehydration n=1 Tax=Medicago truncatula RepID=G7IP43_MEDTR	0	99.31	AT1G30360.1 | Symbols: ERD4 | Early-responsive to dehydration stress protein (ERD4) | chr1:10715892-10718799 FORWARD LENGTH=724	0	98.9	NA	NA	NA	NA	GO:0005576 GO:0005773 GO:0005774 GO:0005886 GO:0009506 GO:0009507 GO:0009941 GO:0016020	extracellular region; "vacuole"; "vacuolar membrane"; "plasma membrane"; "plasmodesma"; "chloroplast"; "chloroplast envelope"; "membrane"	PF02714	Domain of unknown function DUF221	PTHR13018 PTHR13018:SF5	PROBABLE MEMBRANE PROTEIN DUF221-RELATED; "RSN1(YEAST)-RELATED PROBABLE MEMBRANE PROTEIN"	KOG1134	Uncharacterized_conserved_protein	NA	NA	NA	NA
Descriptions of columns. Numbers indicated in column headers.
(1) GlymaID from Gmax version 1.1 release. For more information see http://phytozome.jgi.doe.gov/pz/portal.html#!info?alias=Org_Gmax. Only primary proteins were analyzed.
(2) Top Uniref100 BlastP Hit. Match determined via BLASTP of Glyma1.1 primary proteins against Uniref100 (version 11/26/2012). Minimum e-value score E<10-6 required. Percent coverage determined by dividing the top high scoring pair length by predicted protein length.
(3) Top Descriptive Uniref100 Blastp Hit (3). The BLAST report generated above (2) was parsed to eliminate uninformative hits. Hits including the words uncharacterized, putative, related, predicted, orf, expressed or containing Arabidopsis or Rice gene identifiers (AtXgXXXXX, OsXXgXXXXX) were ignored. Minimum e-value score E<10-6 required. Percent coverage determined by dividing the top high scor…
(4) Top TAIR10 Blastp Hit (4). Match determined via BLASTP of Glyma1.1 primary proteins against Arabidopsis thaliana proteins (TAIR10). Minimum e-value score E<10-6 required. Percent coverage determined by dividing the top high scoring pair length by predicted protein length.
(5) Gene Ontology Biological Process. GO Biological Process terms were assigned to each GlymaID using the GO terms associated with the Top TAIR10 Blastp Hit (4). The annotation information was obtained from TAIR v 10.
(6) Gene Ontology Molecular Function. GO Molecular Function terms were assigned to each GlymaID using the GO terms associated with the Top TAIR10 Blastp Hit (4). The annotation information was obtained from TAIR v 10.
(7) Gene Ontology Cellular Component. GO Cellular Component terms were assigned to each GlymaID using the GO terms associated with the Top TAIR10 Blastp Hit (4). The annotation information was obtained from TAIR v 10.
(8) PFAM IDs assigned by Phytozome. For more information see http://phytozome.jgi.doe.gov/pz/portal.html#!info?alias=Org_Gmax.
(9) PANTHER IDs assigned by Phytozome. For more information see http://phytozome.jgi.doe.gov/pz/portal.html#!info?alias=Org_Gmax.
(10) KOG IDs assigned by Phytozome. For more information see http://phytozome.jgi.doe.gov/pz/portal.html#!info?alias=Org_Gmax.
(11) EC IDs assigned by Phytozome. For more information see http://phytozome.jgi.doe.gov/pz/portal.html#!info?alias=Org_Gmax.
(12) KO IDs assigned by Phytozome. For more information see http://phytozome.jgi.doe.gov/pz/portal.html#!info?alias=Org_Gmax.
